# Supplementary material for: Anaerobic cryoEM protocols for air-sensitive nitrogenase proteins
Source: PubMed Central journal article supplement (PMC11528890; doi:10.1038/s41596-024-00973-5), 2024-04-04
Supplement: NIHMS2029733-supplement-Supplementary.pdf [file NIHMS2029733-supplement-Supplementary.pdf]

Protocol

 Check for updates

# Anaerobic cryoEM protocols for air-sensitive nitrogenase proteins

In the format provided by the authors and unedited

Supplementary information:

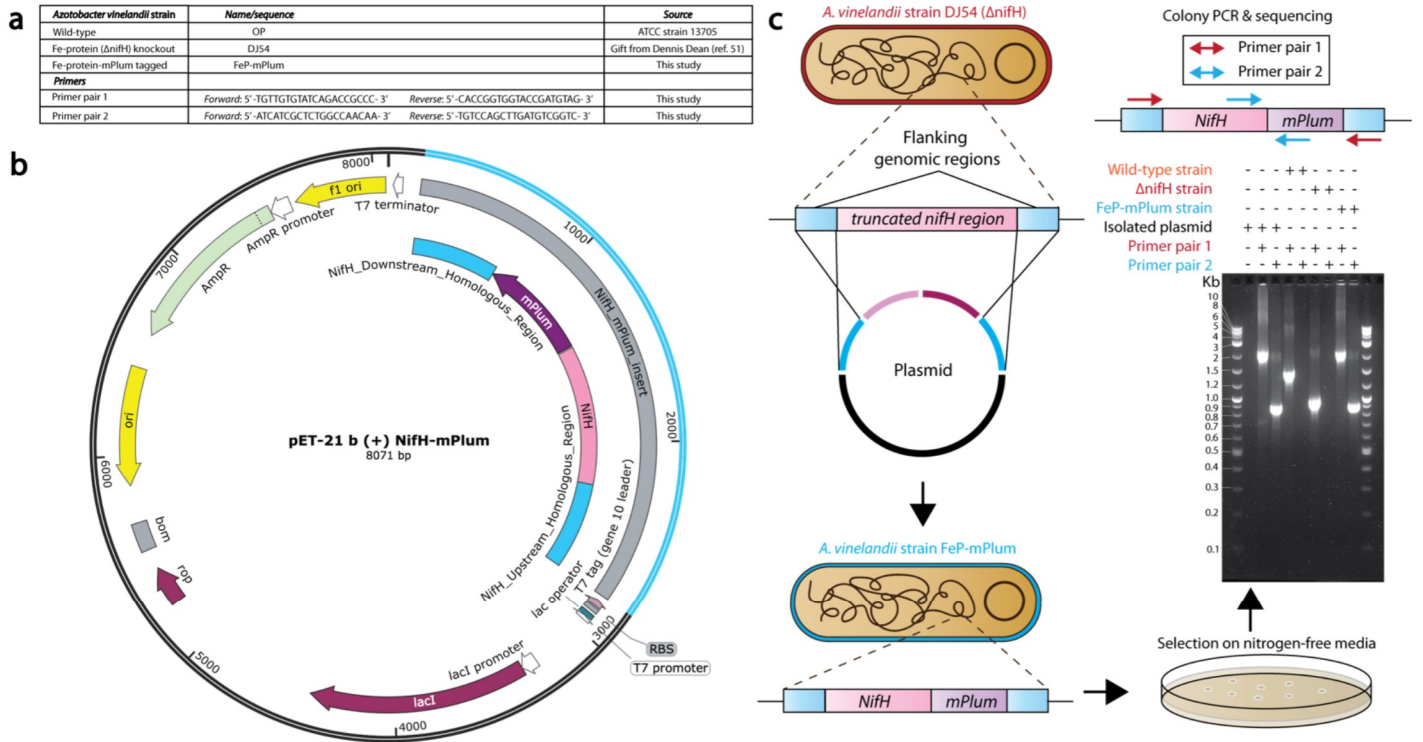

**Supplementary Figure 1. Generation of mPlum-tagged Fe-protein *A. vinelandii* strain.** **a**, Description of strains and primers utilized within this study. **b**, Plasmid map used for generation of the mPlum-tagged Fe-protein *A. vinelandii* strain. **c**, Procedure for generation of the mPlum-tagged Fe-protein *A. vinelandii* strain (FeP-mPlum) via homologous recombination.

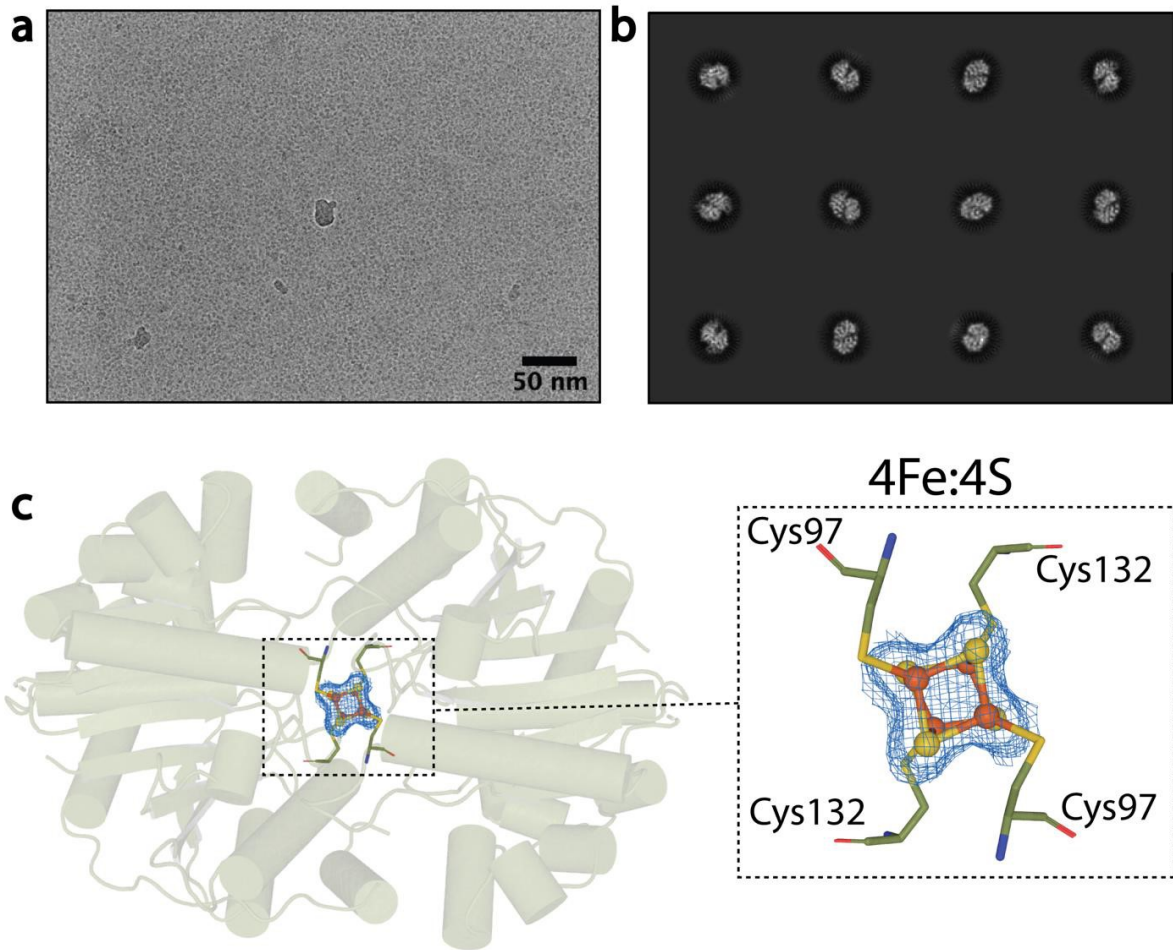

**Supplementary Figure 2: Anaerobic single particle cryoEM of the nitrogenase Fe-protein.** **a**, Representative micrograph of the mPlum-tagged Fe-protein. Scale bar represents 50 nm. **b**, 2D classes of the mPlum-tagged Fe-protein. **c**, Left panel, overview of the cryoEM structure of the Fe-protein. Right panel, zoomed view of the cryoEM density surrounding the 4Fe:4S cluster of the Fe-protein.

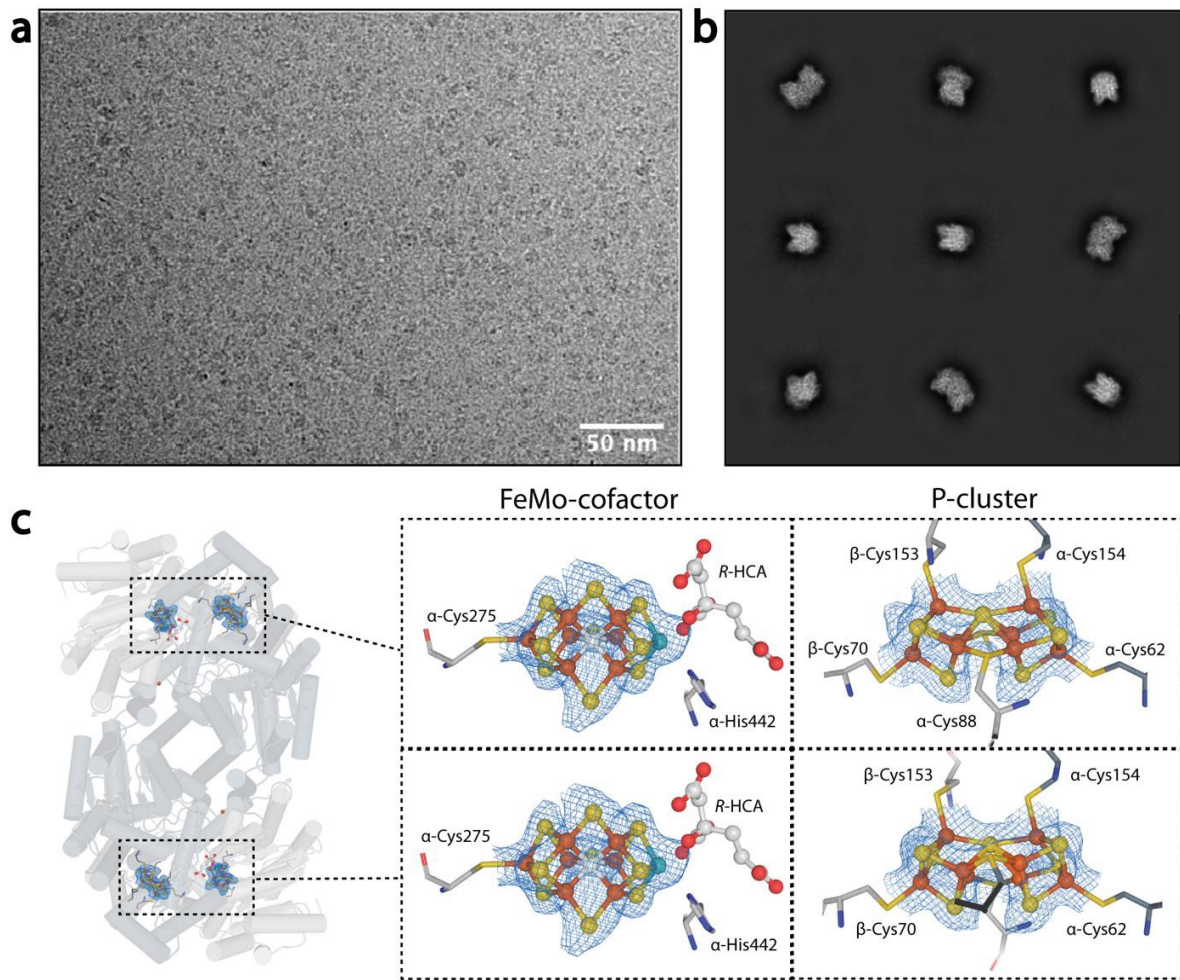

**Supplementary Figure 3: Anaerobic single particle cryoEM of the nitrogenase MoFe-protein.** **a**, Representative micrograph of the MoFe-protein on ultrathin-carbon layered grids. Scale bar represents 50 nm. **b**, 2D classes of the MoFe-protein. **c**, Left panel, overview of the cryoEM structure of the MoFe-protein. Right panel, zoomed view of the cryoEM density surrounding the FeMo-cofactors and P-clusters of the MoFe-protein.

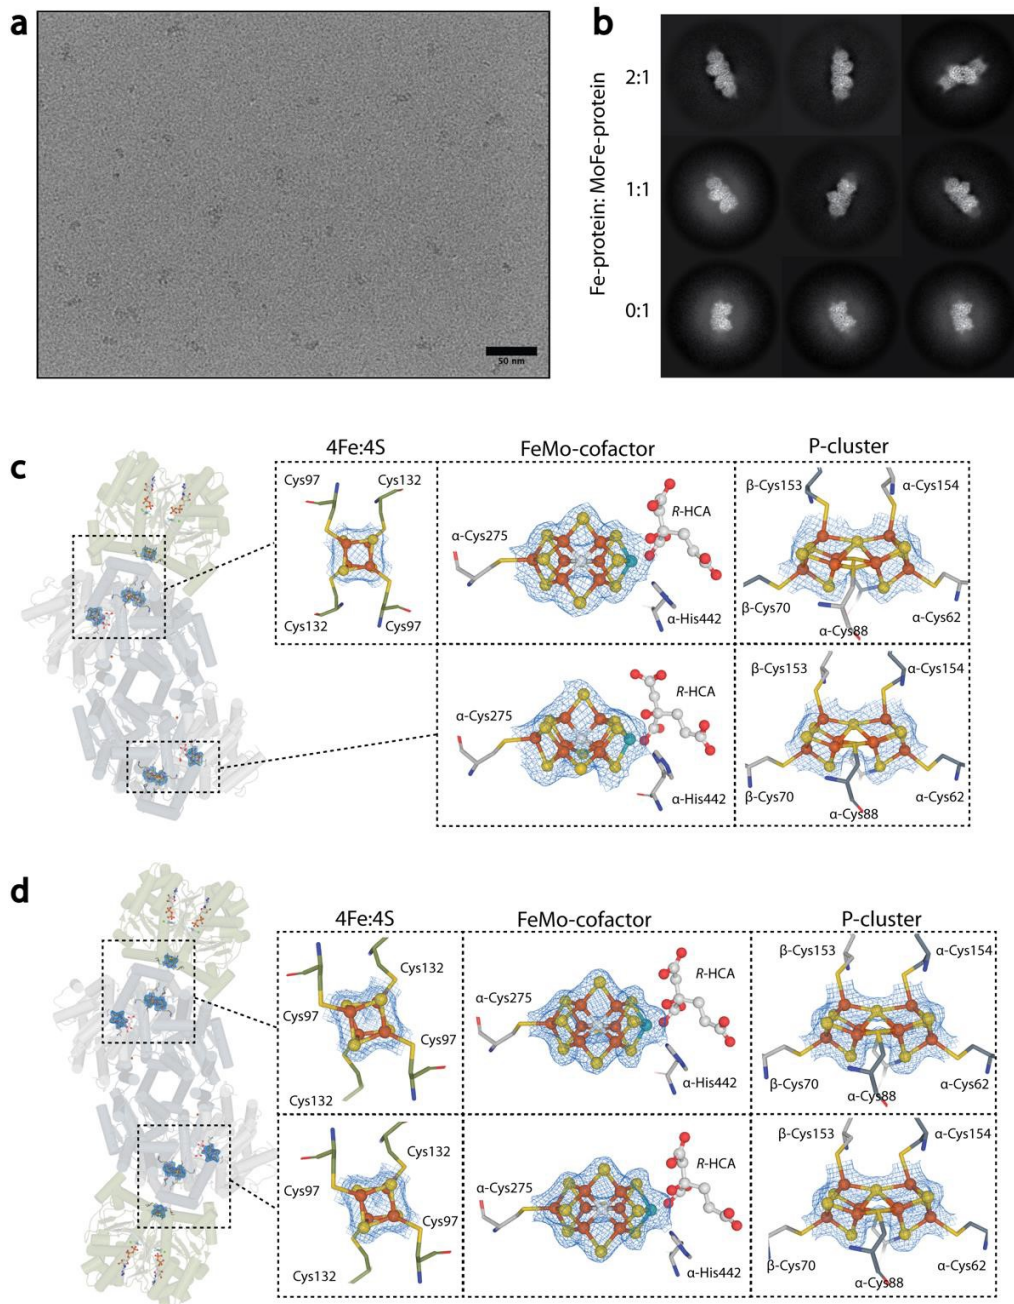

**Supplementary Figure 4: Anaerobic single particle cryoEM of the ADP-AlF<sub>4</sub><sup>-</sup> stabilized nitrogenase Fe-protein:MoFe-protein complex states.** **a**, Representative micrograph of the ADP-AlF<sub>4</sub><sup>-</sup> stabilized complex on ultrathin-carbon layered grids. Scale bar represents 50 nm. **b**, 2D classes of three different complex states found in the dataset. **c**, Left panel, overview of the cryoEM structure of the 1:1 ADP-AlF<sub>4</sub><sup>-</sup> stabilized nitrogenase Fe-protein:MoFe-protein complex. Right panel, zoomed view of the cryoEM density surrounding the 4Fe:4S cluster, FeMo-cofactors, and P-clusters. **d**, Left panel, overview of the cryoEM structure of the 2:1 ADP-AlF<sub>4</sub><sup>-</sup> stabilized nitrogenase Fe-protein:MoFe-protein complex. Right panel, zoomed view of the cryoEM density surrounding the 4Fe:4S cluster, FeMo-cofactors, and P-clusters.
